# Supplementary material for: Semi-coke-based amorphous porous carbon synthesized by a molten salt assisted method for superior lithium storage
Source: Royal Society of Chemistry journal article supplement (doi:10.1039/d2nj04719e), 2022-12-23
Supplement: d2nj04719e1.pdf [file d2nj04719e1.pdf]

## Supporting Information

### Semi-coke-based amorphous porous carbon synthesized by molten salt assisted method for superior lithium storage

Yahong Gu, Yakun Tang, Lang Liu\*, Yue Zhang, Yang Gao, Yang Zhang, Chensong Yang and Ting Liu

State Key Laboratory of Chemistry and Utilization of Carbon Based Energy Resources; College of Chemistry, Xinjiang University, Urumqi, 830017, Xinjiang, China.

#### Materials characterization

The crystal structure of the material was determined by X-ray diffraction measurements (XRD, Ultima IV-185, Rigaku) using Cu K $\alpha$  radiation ( $\lambda = 0.15444$  nm). Field emission scanning electron microscopy (SEM, S-4800, Hitachi, Japan) and high-resolution transmission electron microscopy (HRTEM, JEM-2100F, Japan) were used to characterize the surface morphology. A thermal analyzer (TG analysis, STDQ600, TA, USA) was carried out using the thermal gravimetric analysis at a heating rate of 10 °C/min in air atmosphere. Bruker Senterra Spectrometer (532 nm) was used to measure the Raman spectra. The specific surface area and porosity of the samples were studied by N<sub>2</sub> physical adsorption-desorption isothermal method (ASAP 2460, Micromeritics, USA).

#### Electrochemical characterization

The preparation process of anode electrodes is as follows: HCs, conductive carbon black and poly(vinylidene fluoride) were mechanically mixed with mass ratios of 8:1:1. Then, N-methyl-2-pyrrolidone (NMP) was added to the mixed powder to form homogeneous slurry. Finally, the slurry was uniformly coated on copper foil by using doctor blade and dried at 110°C for 12 h under vacuum oven. Using lithium metal as the counter electrode, a Celgard 2400 polypropylene film as the separator and 1 M LiPF<sub>6</sub> solution in a mixed solvent of ethylene carbonate/diethyl carbonate (1:1 by volume) as the electrolyte, coin batteries (2032 type) were assembled. Electrochemical performance tests were carried out using a battery test system (CT2001A, Land, China) in the voltage range of 0.01-3.0 V (vs. Li<sup>+</sup>/Li). Cyclic voltammetry (CV) was tested using a CHI 660D electrochemical workstation in the voltage range of 0.01-3.0 V with a scan rate of 0.1 mV s<sup>-1</sup>.

**Table S1:** Elemental composition of semi-coke.

| Elemental analysis/wt% |      |      |      |      |
|------------------------|------|------|------|------|
| C                      | H    | N    | S    | O    |
| 71.58                  | 3.66 | 1.57 | 0.48 | 22.7 |

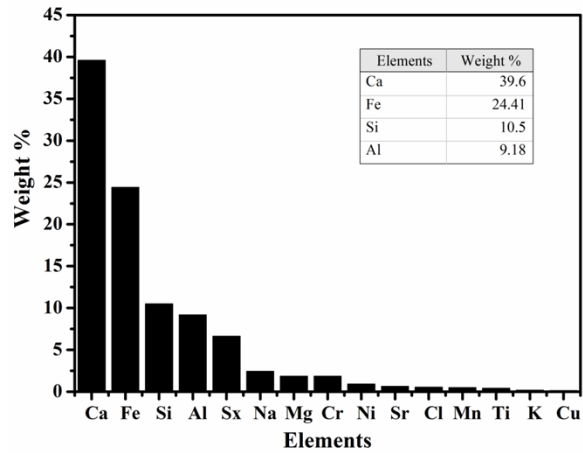

Fig. S1: XRF pattern of ash in raw material semi-coke (SC).

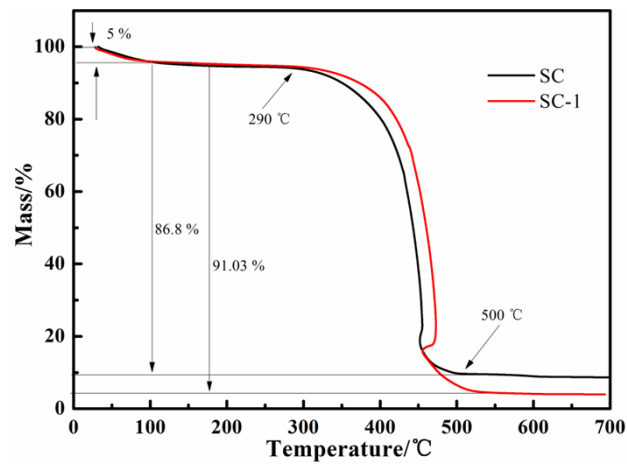

Fig. S2: TG curves of SC and SC-1 in air.

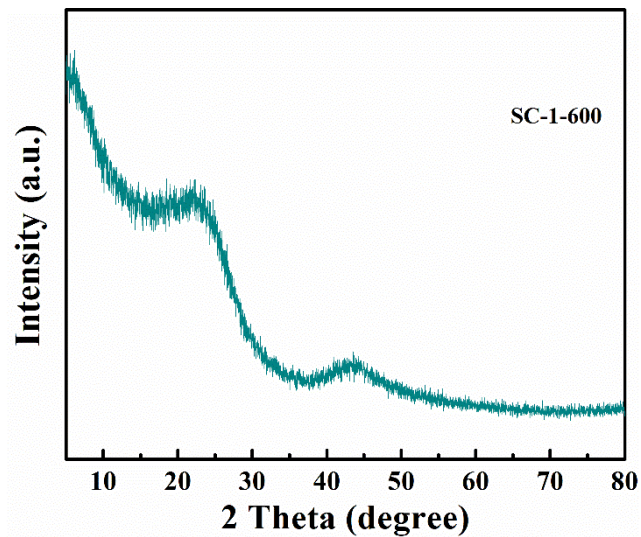

Fig. S3: XRD pattern of SC-1-600.

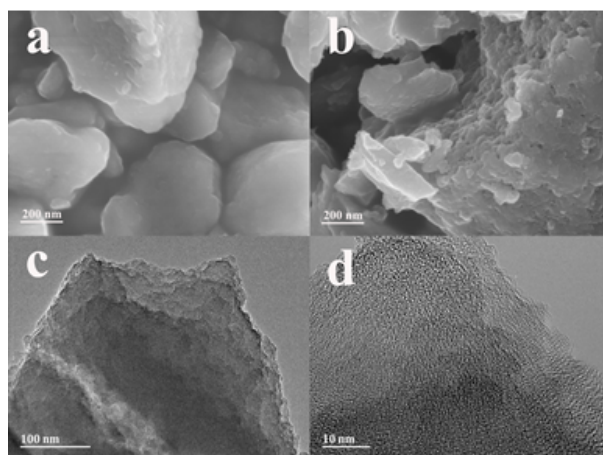

**Fig. S4:** SEM images (a, b) of SC and SC-1, TEM (c), HRTEM image (d) of SC-1.

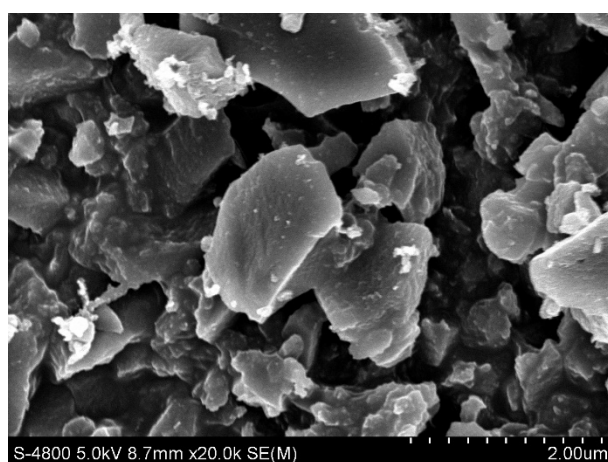

**Fig. S5:** SEM images of SC-1-600.

**Table S2:** Summary of physical characterization of the samples.

| Samples | SSA <sup>a</sup><br>m <sup>2</sup> g <sup>-1</sup> | V <sub>t</sub> <sup>b</sup><br>cm <sup>3</sup> g <sup>-1</sup> | V <sub>m</sub> <sup>c</sup><br>cm <sup>3</sup> g <sup>-1</sup> |
|---------|----------------------------------------------------|----------------------------------------------------------------|----------------------------------------------------------------|
| HC-500  | 91.09                                              | 0.09                                                           | 0.02                                                           |
| HC-600  | 343.60                                             | 0.46                                                           | 0.12                                                           |
| HC-700  | 37.99                                              | 0.06                                                           | 0.01                                                           |
| SC-1    | 16.55                                              | 0.02                                                           | <0.01                                                          |
| SC      | 4.57                                               | <0.01                                                          | <0.01                                                          |

<sup>a</sup> SSA specific surface area

<sup>b</sup> total pore volume from adsorption isotherms at a relative pressure P/P<sub>0</sub> of 0.95

<sup>c</sup> mesopore volume (pore size 2-50 nm) from BET analysis

**Table S3:** The carbon yield of HCs at different temperature.

| Carbonization temperature | 500°C | 600°C | 700°C |
|---------------------------|-------|-------|-------|
| HC                        | 57.2% | 53%   | 48.4% |
